# Supplementary material for: Stray Dogs and Public Health: Population Estimation in Punjab, India
Source: MDPI journal article supplement (doi:10.3390/vetsci9020075), 2022-02-10
Supplement: s1 [file s1]

**Table S1:** The adult human population (Census India 2011) and the residential area of selected villages and wards included in a survey to determine the dog population of the Punjab state of India.

| Name of Village/Ward | District     | Adult Human Population | Residential Area (in km <sup>2</sup> ) |
|----------------------|--------------|------------------------|----------------------------------------|
| <b>Rural</b>         |              |                        |                                        |
| Galib Ran Singh      | Ludhiana     | 929                    | 0.07                                   |
| Pipli                | Faridkot     | 2808                   | 0.37                                   |
| Jodhpur              | Barnala      | 2728                   | 0.27                                   |
| Rauli                | Hoshiarpur   | 753                    | 0.08                                   |
| Mangewala            | Moga         | 1836                   | 0.15                                   |
| Karahal Kalan        | Kapurthala   | 583                    | 0.05                                   |
| Deugarh              | Patiala      | 836                    | 0.08                                   |
| Mander               | Mansa        | 1986                   | 0.16                                   |
| Rali Ali Kalan       | Gurdaspur    | 950                    | 0.09                                   |
| Mahdian              | Fateghrsahib | 1211                   | 0.1                                    |
| Rangian              | Ropar        | 1150                   | 0.09                                   |
| Gobindpura           | Bathinda     | 4822                   | 0.42                                   |
| Kot Kalan            | Jalandher    | 663                    | 0.1                                    |
| Khoba                | Pathankot    | 792                    | 0.03                                   |
| Gobindgarh           | Fazilka      | 3153                   | 0.4                                    |
| Jethuwal             | Amritsar     | 2985                   | 0.23                                   |
| Bugar                | Sangrur      | 1930                   | 0.07                                   |
| Haraj                | Muktsar      | 1159                   | 0.16                                   |
| Nabipur              | Tarntarn     | 999                    | 0.12                                   |
| Kheda                | Mohali       | 772                    | 0.07                                   |
| Tut                  | Firozpur     | 1656                   | 0.16                                   |
| Sodhian              | Nawanshehar  | 755                    | 0.06                                   |

| Urban                  |             |          |         |
|------------------------|-------------|----------|---------|
| Bhagta Bhai ka ward :8 | Bathinda    | 1136     | 0.05    |
| Bhagta Bhai ka ward :1 | Bathinda    | 964      | 0.14    |
| Balachaur ward :4      | Nawanshehar | 1066     | 0.2     |
| Balachaur ward :5      | Nawanshehar | 1136     | 0.05    |
| Bathinda ward :9       | Bathinda    | 3695     | 0.37    |
| Bathinda ward :11      | Bathinda    | 4370     | 0.49    |
| Zeera ward: 15         | Firozpur    | 1461     | 0.17    |
| Zeera ward: 16         | Firozpur    | 1732     | 1.29    |
| Ludhiana ward: 62      | Ludhiana    | 6415     | 0.47    |
| Ludhiana ward: 63      | Ludhiana    | 16067    | 1.21    |
| Overall                |             |          |         |
| Punjab                 | Rural       | 12201170 | 1857.24 |
|                        | Urban       | 7315518  | 1139.39 |
|                        | Industrial  |          | 60.01   |

**Table S2:** Total number of stray dogs estimated in different village(s)/ward(s) in Punjab state of India (using *Lincoln-*

*Petersen's formula with Chapman's correction*)

| Name of the village/ward | District | Type of dog       | n1        | n2        | m         | Stray dog count per village/ward (95% CI) | Stray Dog Population /km2 (95% CI) | Stray Dogs/1000 adult humans |
|--------------------------|----------|-------------------|-----------|-----------|-----------|-------------------------------------------|------------------------------------|------------------------------|
| Galib Ran Singh          | Ludhiana | Adult Male        | 13        | 11        | 10        | 14 (13, 15)                               | 204 (186, 214)                     | 15 (14, 16)                  |
|                          |          | Adult female      | 9         | 10        | 6         | 15 (11, 18)                               | 210 (157, 257)                     | 16 (12, 19)                  |
|                          |          | Total adult       | 22        | 21        | 16        | 29 (24, 32)                               | 411 (343, 457)                     | 31 (26, 34)                  |
|                          |          | Young male        | 3         | 4         | 3         | 4 (4, 4)                                  | 57 (57, 57)                        | 4 (4, 4)                     |
|                          |          | Young female      | 2         | 1         | 1         | 2 (2, 2)                                  | 29 (29, 29)                        | 2 (2, 2)                     |
|                          |          | Total young       | 5         | 5         | 4         | 6 (5, 7)                                  | 89 (71, 100)                       | 7 (5, 8)                     |
|                          |          | Total male        | 16        | 15        | 13        | 18 (17, 20)                               | 263 (243, 286)                     | 20 (18, 22)                  |
|                          |          | Total female      | 11        | 11        | 7         | 17 (13, 21)                               | 243 (186, 300)                     | 18 (14, 23)                  |
|                          |          | <b>Total dogs</b> | <b>27</b> | <b>26</b> | <b>20</b> | 35 (31, 39)                               | 500 (443, 557)                     | 38 (33, 42)                  |
| Pipli                    | Faridkot | Adult Male        | 18        | 21        | 12        | 31 (25, 37)                               | 84 (68, 100)                       | 11.09 (9, 13)                |
|                          |          | Adult female      | 17        | 18        | 13        | 23 (20, 26)                               | 63 (54, 70)                        | 8.34 (7, 9)                  |
|                          |          |                   |           |           |           |                                           |                                    |                              |

|         |         |                   |           |           |           |             |                |                |
|---------|---------|-------------------|-----------|-----------|-----------|-------------|----------------|----------------|
| Jodhpur | Barnala | Total adult       | 35        | 39        | 25        | 54 (48, 61) | 147 (130, 165) | 19.37 (17, 22) |
|         |         | Young male        | 5         | 4         | 2         | 9 (5, 13)   | 24 (14, 35)    | 3.21 (2, 5)    |
|         |         | Young female      | 3         | 5         | 2         | 7 (4, 10)   | 19 (11, 27)    | 2.49 (1, 4)    |
|         |         | Total young       | 8         | 9         | 4         | 17 (8, 26)  | 46 (22, 70)    | 6.05 (3, 9)    |
|         |         | Total male        | 23        | 25        | 14        | 41 (32, 49) | 110 (86, 132)  | 14.46 (11, 17) |
|         |         | Total female      | 20        | 23        | 15        | 31 (26, 35) | 82 (70, 95)    | 10.86 (9, 12)  |
|         |         | <b>Total dogs</b> | <b>43</b> | <b>48</b> | <b>29</b> | 71 (62, 80) | 192 (168, 216) | 25.24 (22, 28) |
|         |         | Adult Male        | 21        | 19        | 14        | 28 (24, 32) | 105 (89, 119)  | 10.38 (9, 12)  |
|         |         | Adult female      | 17        | 20        | 15        | 23 (21, 24) | 84 (78, 89)    | 8.3 (8, 9)     |
|         |         | Total adult       | 38        | 39        | 29        | 51 (47, 55) | 189 (174, 204) | 18.7 (17, 20)  |
|         |         | Young male        | 3         | 4         | 2         | 6 (4, 8)    | 21 (15, 30)    | 2.08 (1, 3)    |
|         |         | Young female      | 6         | 5         | 4         | 7 (6, 9)    | 27 (22, 33)    | 2.71 (2, 3)    |
|         |         | Total young       | 9         | 9         | 6         | 13 (10, 17) | 49 (37, 63)    | 4.87 (4, 6)    |
|         |         | Total male        | 24        | 23        | 16        | 34 (29, 39) | 127 (107, 144) | 12.57 (11, 14) |
|         |         | Total female      | 23        | 25        | 19        | 30 (28, 33) | 112 (104, 122) | 11.07 (10, 12) |
|         |         | <b>Total dogs</b> | <b>47</b> | <b>48</b> | <b>35</b> | 64 (59, 70) | 238 (219, 259) | 23.58 (22, 26) |

|           |            |                   |           |           |          |             |                |                |
|-----------|------------|-------------------|-----------|-----------|----------|-------------|----------------|----------------|
| Rauli     | Hoshiarpur | Adult Male        | 5         | 4         | 3        | 7 (5, 8)    | 81 (63, 100)   | 8.63 (7, 11)   |
|           |            | Adult female      | 6         | 5         | 4        | 7 (6, 9)    | 93 (75, 113)   | 9.83 (8, 12)   |
|           |            | Total adult       | 11        | 9         | 7        | 14 (11, 17) | 175 (138, 213) | 18.59 (15, 23) |
|           |            | Young male        | 1         | 2         | 1        | 2 (2, 2)    | 25 (25, 25)    | 2.66 (3, 3)    |
|           |            | Young female      | 2         | 2         | 1        | 4 (2, 5)    | 44 (25, 63)    | 4.65 (3, 7)    |
|           |            | Total young       | 3         | 4         | 2        | 6 (3, 9)    | 71 (38, 113)   | 7.53 (4, 12)   |
|           |            | Total male        | 6         | 6         | 4        | 9 (7, 11)   | 110 (88, 138)  | 11.69 (9, 15)  |
|           |            | Total female      | 8         | 7         | 5        | 11 (8, 14)  | 138 (100, 175) | 14.61 (11, 19) |
|           |            | <b>Total dogs</b> | <b>14</b> | <b>13</b> | <b>9</b> | 20 (16, 24) | 250 (200, 300) | 26.56 (21, 32) |
|           |            |                   |           |           |          |             |                |                |
| Mangewala | Moga       | Adult Male        | 16        | 18        | 13       | 22 (20, 25) | 147 (250, 313) | 12.02 (11, 14) |
|           |            | Adult female      | 15        | 12        | 10       | 18 (16, 20) | 119 (200, 250) | 9.75 (9, 11)   |
|           |            | Total adult       | 31        | 30        | 23       | 40 (36, 44) | 269 (450, 550) | 21.97 (20, 24) |
|           |            | Young male        | 4         | 3         | 3        | 4 (4, 4)    | 27 (50, 50)    | 2.18 (2, 2)    |
|           |            | Young female      | 3         | 4         | 2        | 6 (4, 8)    | 38 (50, 100)   | 3.09 (2, 4)    |
|           |            | Total young       | 7         | 7         | 5        | 10 (7, 12)  | 64 (88, 150)   | 5.27 (4, 7)    |
|           |            | Total male        | 20        | 21        | 16       | 25 (24, 29) | 168 (300, 363) | 13.71 (13, 16) |
|           |            | Total female      | 18        | 16        | 12       | 24 (20, 27) | 159 (250, 300) | 12.99 (11, 15) |

|               |            |                   |           |           |           |             |                        |                       |
|---------------|------------|-------------------|-----------|-----------|-----------|-------------|------------------------|-----------------------|
|               |            | <b>Total dogs</b> | <b>38</b> | <b>37</b> | <b>28</b> | 50 (46, 55) | 338)<br>334 (575, 688) | 15)<br>27.29 (25, 30) |
| Karahal Kalan | Kapurthala | Adult Male        | 8         | 6         | 4         | 12 (8, 15)  | 232 (160, 300)         | 19.9 (14, 26)         |
|               |            | Adult female      | 4         | 5         | 4         | 5 (5, 5)    | 100 (100, 100)         | 8.58 (9, 9)           |
|               |            | Total adult       | 12        | 11        | 8         | 16 (13, 19) | 327 (260, 380)         | 28.01 (22, 33)        |
|               |            | Young male        | 2         | 3         | 1         | 5 (2, 8)    | 100 (40, 160)          | 8.58 (3, 14)          |
|               |            | Young female      | 3         | 4         | 3         | 4 (4, 4)    | 80 (80, 80)            | 6.86 (7, 7)           |
|               |            | Total young       | 5         | 7         | 4         | 9 (6, 11)   | 172 (120, 220)         | 14.75 (10, 19)        |
|               |            | Total male        | 10        | 9         | 5         | 17 (11, 23) | 347 (220, 460)         | 29.73 (19, 39)        |
|               |            | Total female      | 7         | 9         | 7         | 9 (9, 9)    | 180 (180, 180)         | 15.44 (15, 15)        |
|               |            | <b>Total dogs</b> | <b>17</b> | <b>18</b> | <b>12</b> | 25 (21, 29) | 506 (420, 580)         | 43.41 (36, 50)        |
| Devgarh       | Patiala    | Adult Male        | 13        | 10        | 7         | 18 (14, 23) | 228 (175, 288)         | 21.83 (17, 28)        |
|               |            | Adult female      | 7         | 6         | 5         | 8 (7, 10)   | 104 (88, 125)          | 9.96 (8, 12)          |
|               |            | Total adult       | 20        | 16        | 12        | 26 (22, 31) | 331 (275, 388)         | 31.65 (26, 37)        |

|                   |           |                   |           |              |                |                |                |                |                |                |
|-------------------|-----------|-------------------|-----------|--------------|----------------|----------------|----------------|----------------|----------------|----------------|
|                   |           | Young male        | 2         | 2            | 2              | 2 (2, 2)       | 25 (25, 25)    | 2.39 (2, 2)    |                |                |
|                   |           | Young female      | 4         | 3            | 3              | 4 (4, 4)       | 50 (50, 50)    | 4.78 (5, 5)    |                |                |
|                   |           | Total young       | 6         | 5            | 5              | 6 (6, 6)       | 75 (75, 75)    | 7.18 (7, 7)    |                |                |
|                   |           | Total male        | 15        | 12           | 9              | 20 (16, 23)    | 248 (200, 288) | 23.68 (19, 28) |                |                |
|                   |           | Total female      | 11        | 9            | 8              | 12 (11, 14)    | 154 (138, 175) | 14.75 (13, 17) |                |                |
|                   |           | <b>Total dogs</b> | <b>26</b> | <b>21</b>    | <b>17</b>      | 32 (28, 36)    | 400 (350, 450) | 38.28 (33, 43) |                |                |
|                   |           | Mander            | Mansa     | Adult Male   | 21             | 18             | 17             | 22 (21, 23)    | 139 (131, 144) | 11.19 (11, 12) |
|                   |           |                   |           | Adult female | 16             | 14             | 12             | 19 (17, 20)    | 116 (106, 125) | 9.38 (9, 10)   |
|                   |           |                   |           | Total adult  | 37             | 32             | 29             | 40 (39, 43)    | 255 (244, 269) | 20.54 (20, 22) |
|                   |           |                   |           | Young male   | 3              | 4              | 3              | 4 (4, 4)       | 25 (25, 25)    | 2.01 (2, 2)    |
| Young female      | 3         |                   |           | 3            | 2              | 4 (3, 6)       | 27 (19, 38)    | 2.18 (2, 3)    |                |                |
| Total young       | 6         |                   |           | 7            | 5              | 8 (7, 10)      | 52 (44, 63)    | 4.19 (4, 5)    |                |                |
| Total male        | 24        |                   |           | 22           | 20             | 26 (25, 28)    | 165 (156, 175) | 13.28 (13, 14) |                |                |
| Total female      | 19        |                   |           | 17           | 14             | 23 (21, 25)    | 144 (131, 156) | 11.58 (11, 13) |                |                |
| <b>Total dogs</b> | <b>43</b> | <b>39</b>         | <b>34</b> | 49 (47, 52)  | 308 (294, 325) | 24.82 (24, 26) |                |                |                |                |

|                |                 |                   |           |           |          |                    |                       |                       |
|----------------|-----------------|-------------------|-----------|-----------|----------|--------------------|-----------------------|-----------------------|
| Rali Ali Kalan | Gurdaspur       | Adult Male        | 6         | 7         | 3        | 13 (7, 19)         | 144 (78, 211)         | 13.68 (7, 20)         |
|                |                 | Adult female      | 4         | 5         | 2        | 9 (5, 13)          | 100 (56, 144)         | 9.47 (5, 14)          |
|                |                 | Total adult       | 10        | 12        | 5        | 23 (14, 32)        | 254 (156, 356)        | 24.03 (15, 34)        |
|                |                 | Young male        | 6         | 3         | 2        | 8 (5, 12)          | 93 (56, 133)          | 8.77 (5, 13)          |
|                |                 | Young female      | 2         | 2         | 2        | 2 (2, 2)           | 22 (22, 22)           | 2.11 (2, 2)           |
|                |                 | Total young       | 8         | 5         | 4        | 10 (7, 13)         | 109 (78, 144)         | 10.32 (7, 14)         |
|                |                 | Total male        | 12        | 10        | 5        | 23 (14, 32)        | 254 (156, 356)        | 24.03 (15, 34)        |
|                |                 | Total female      | 6         | 7         | 4        | 10 (7, 13)         | 113 (78, 144)         | 10.74 (7, 14)         |
|                |                 | <b>Total dogs</b> | <b>18</b> | <b>17</b> | <b>9</b> | <b>33 (24, 42)</b> | <b>369 (267, 467)</b> | <b>34.95 (25, 44)</b> |
| Mahdian        | Fatehgarh Sahib | Adult Male        | 9         | 7         | 6        | 10 (9, 12)         | 104 (90, 120)         | 8.61 (7, 10)          |
|                |                 | Adult female      | 4         | 6         | 3        | 8 (5, 10)          | 78 (50, 100)          | 6.4 (4, 8)            |
|                |                 | Total adult       | 13        | 13        | 9        | 19 (15, 22)        | 186 (150, 220)        | 15.36 (12, 18)        |
|                |                 | Young male        | 1         | 2         | 0        | 5 (0, 10)          | 50 (0, 100)           | 4.13 (0, 8)           |
|                |                 | Young female      | 3         | 4         | 3        | 4 (4, 4)           | 40 (40, 40)           | 3.3 (3, 3)            |
|                |                 | Total young       | 4         | 6         | 3        | 8 (5, 11)          | 78 (50, 110)          | 6.4 (4, 9)            |
|                |                 | Total male        | 10        | 9         | 6        | 15 (11, 18)        | 147 (110, 180)        | 12.15 (9, 15)         |
|                |                 | Total female      | 7         | 10        | 6        | 12 (10, 13)        | 116 (100, 132)        | 9.55 (8, 11)          |



|            |                     |                   |           |           |           |             |                        |                |
|------------|---------------------|-------------------|-----------|-----------|-----------|-------------|------------------------|----------------|
|            |                     | <b>Total dogs</b> | <b>17</b> | <b>19</b> | <b>12</b> | 27 (22, 31) | 130)<br>267 (220, 310) | 22.04 (18, 26) |
| Rangian    | Rupnagar<br>(Ropar) | Adult Male        | 11        | 12        | 8         | 16 (13, 19) | 181 (144, 211)         | 14.2 (11, 17)  |
|            |                     | Adult female      | 6         | 7         | 5         | 8 (7, 10)   | 93 (78, 111)           | 7.24 (6, 9)    |
|            |                     | Total adult       | 17        | 19        | 13        | 25 (21, 29) | 275 (233, 322)         | 21.49 (18, 25) |
|            |                     | Young male        | 1         | 1         | 1         | 1 (1, 1)    | 11 (11, 11)            | 0.87 (1, 1)    |
|            |                     | Young female      | 3         | 3         | 2         | 4 (3, 6)    | 48 (33, 67)            | 3.77 (3, 5)    |
|            |                     | Total young       | 4         | 4         | 3         | 5 (3, 7)    | 58 (33, 78)            | 4.57 (3, 6)    |
|            |                     | Total male        | 12        | 13        | 9         | 17 (14, 19) | 191 (156, 211)         | 14.96 (12, 17) |
|            |                     | Total female      | 9         | 10        | 7         | 13 (10, 15) | 142 (111, 167)         | 11.09 (9, 13)  |
|            |                     | <b>Total dogs</b> | <b>21</b> | <b>23</b> | <b>16</b> | 30 (26, 34) | 334 (289, 378)         | 26.14 (23, 30) |
| Gobindpura | Bathinda            | Adult Male        | 23        | 21        | 17        | 28 (25, 31) | 67 (60, 74)            | 5.88 (5, 6)    |
|            |                     | Adult female      | 18        | 15        | 11        | 24 (20, 28) | 58 (48, 67)            | 5.05 (4, 6)    |
|            |                     | Total adult       | 41        | 36        | 28        | 53 (47, 57) | 125 (112, 136)         | 10.91 (10, 12) |
|            |                     | Young male        | 4         | 5         | 4         | 5 (5, 5)    | 12 (12, 12)            | 1.04 (1, 1)    |
|            |                     | Young             | 5         | 2         | 2         | 5 (5, 5)    | 12 (12, 12)            | 1.04 (1, 1)    |

|          |           |                   |           |           |           |             |                |                |
|----------|-----------|-------------------|-----------|-----------|-----------|-------------|----------------|----------------|
|          |           | female            |           |           |           |             |                |                |
|          |           | Total young       | 9         | 7         | 6         | 10 (8, 12)  | 25 (19, 29)    | 2.16 (2, 2)    |
|          |           | Total male        | 27        | 26        | 21        | 33 (30, 36) | 79 (71, 86)    | 6.92 (6, 7)    |
|          |           | Total female      | 23        | 17        | 13        | 30 (25, 32) | 71 (60, 76)    | 6.19 (5, 7)    |
|          |           | <b>Total dogs</b> | <b>50</b> | <b>43</b> | <b>34</b> | 63 (57, 68) | 150 (136, 162) | 13.09 (12, 14) |
| KotKalan | Jalandhar | Adult Male        | 6         | 7         | 4         | 10 (7, 13)  | 102 (70, 130)  | 15.38 (11, 20) |
|          |           | Adult female      | 5         | 4         | 3         | 7 (4, 8)    | 65 (40, 80)    | 9.8 (6, 12)    |
|          |           | Total adult       | 11        | 11        | 7         | 17 (13, 21) | 170 (130, 210) | 25.64 (20, 32) |
|          |           | Young male        | 1         | 2         | 0         | 5 (0, 10)   | 50 (0, 100)    | 7.54 (0, 15)   |
|          |           | Young female      | 1         | 2         | 1         | 2 (2, 2)    | 20 (20, 20)    | 3.02 (3, 3)    |
|          |           | Total young       | 2         | 4         | 1         | 7 (-1, 14)  | 65 (-10, 140)  | 9.8 (-2, 21)   |
|          |           | Total male        | 7         | 9         | 4         | 15 (9, 21)  | 150 (90, 210)  | 22.62 (14, 32) |
|          |           | Total female      | 6         | 6         | 4         | 9 (6, 11)   | 88 (60, 110)   | 13.27 (9, 17)  |
|          |           | <b>Total dogs</b> | <b>13</b> | <b>15</b> | <b>8</b>  | 24 (17, 30) | 239 (170, 300) | 36.03 (26, 45) |
|          |           |                   |           |           |           |             |                |                |
| Khoba    | Pathankot | Adult Male        | 4         | 3         | 3         | 4 (4, 4)    | 133 (133, 133) | 5.05 (5, 5)    |
|          |           | Adult female      | 3         | 4         | 2         | 6 (3, 8)    | 189 (100, 267) | 7.16 (4, 10)   |
|          |           | Total adult       | 7         | 7         | 5         | 10 (7, 12)  | 322 (233, 322) | 12.21 (9, 15)  |

|            |         |                   |           |           |           |             |                |                |
|------------|---------|-------------------|-----------|-----------|-----------|-------------|----------------|----------------|
|            |         |                   |           |           |           | 400)        |                |                |
|            |         | Young male        | 2         | 1         | 1         | 2 (2, 2)    | 67 (67, 67)    | 2.53 (3, 3)    |
|            |         | Young female      | 1         | 1         | 1         | 1 (1, 1)    | 33 (33, 33)    | 1.26 (1, 1)    |
|            |         | Total young       | 3         | 2         | 2         | 3 (3, 3)    | 100 (100, 100) | 3.79 (4, 4)    |
|            |         | Total male        | 6         | 4         | 4         | 6 (6, 6)    | 200 (200, 200) | 7.58 (8, 8)    |
|            |         | Total female      | 4         | 5         | 3         | 7 (4, 8)    | 217 (133, 267) | 8.21 (5, 10)   |
|            |         | <b>Total dogs</b> | <b>10</b> | <b>9</b>  | <b>7</b>  | 13 (10, 15) | 425 (333, 500) | 16.1 (13, 19)  |
| Gobindgarh | Fazilka | Adult Male        | 25        | 20        | 14        | 35 (29, 42) | 89 (73, 105)   | 11.23 (9, 13)  |
|            |         | Adult female      | 15        | 16        | 12        | 18 (15, 20) | 45 (38, 50)    | 5.68 (5, 6)    |
|            |         | Total adult       | 40        | 36        | 26        | 55 (48, 62) | 138 (120, 155) | 17.5 (15, 20)  |
|            |         | Young male        | 3         | 4         | 3         | 4 (4, 4)    | 10 (10, 10)    | 1.27 (1, 1)    |
|            |         | Young female      | 4         | 5         | 4         | 5 (5, 5)    | 13 (13, 13)    | 1.59 (2, 2)    |
|            |         | Total young       | 7         | 9         | 7         | 9 (9, 9)    | 23 (23, 23)    | 2.85 (3, 3)    |
|            |         | Total male        | 28        | 24        | 17        | 39 (33, 45) | 98 (83, 113)   | 12.46 (10, 14) |
|            |         | Total female      | 19        | 21        | 16        | 25 (22, 27) | 62 (55, 68)    | 7.89 (7, 9)    |
|            |         | <b>Total dogs</b> | <b>47</b> | <b>45</b> | <b>33</b> | 64 (57, 70) | 160 (143, 175) | 20.28 (18, 22) |

|          |          |                   |           |           |           |             |                |                |
|----------|----------|-------------------|-----------|-----------|-----------|-------------|----------------|----------------|
| Jethuwal | Amritsar | Adult Male        | 19        | 17        | 14        | 23 (20, 25) | 100 (87, 109)  | 7.71 (7, 8)    |
|          |          | Adult female      | 13        | 11        | 10        | 14 (13, 15) | 62 (57, 65)    | 4.78 (4, 5)    |
|          |          | Total adult       | 32        | 28        | 24        | 37 (34, 40) | 162 (148, 174) | 12.49 (11, 13) |
|          |          | Young male        | 2         | 4         | 2         | 4 (4, 4)    | 17 (17, 17)    | 1.34 (1, 1)    |
|          |          | Young female      | 6         | 6         | 4         | 9 (6, 11)   | 38 (26, 48)    | 2.95 (2, 4)    |
|          |          | Total young       | 8         | 10        | 6         | 13 (9, 16)  | 57 (39, 70)    | 4.4 (3, 5)     |
|          |          | Total male        | 21        | 21        | 16        | 27 (24, 30) | 119 (104, 130) | 9.2 (8, 10)    |
|          |          | Total female      | 19        | 17        | 14        | 23 (20, 25) | 100 (87, 109)  | 7.71 (7, 8)    |
|          |          | <b>Total dogs</b> | <b>40</b> | <b>38</b> | <b>30</b> | 51 (46, 55) | 220 (200, 239) | 16.94 (15, 18) |
| Bugar    | Sangrur  | Adult Male        | 12        | 10        | 9         | 13 (12, 14) | 190 (171, 200) | 6.89 (6, 7)    |
|          |          | Adult female      | 9         | 10        | 7         | 13 (10, 15) | 182 (143, 214) | 6.61 (5, 8)    |
|          |          | Total adult       | 21        | 20        | 16        | 26 (23, 29) | 374 (329, 414) | 13.56 (12, 15) |
|          |          | Young male        | 3         | 2         | 2         | 3 (3, 3)    | 43 (43, 43)    | 1.55 (2, 2)    |
|          |          | Young female      | 3         | 1         | 1         | 3 (3, 3)    | 43 (43, 43)    | 1.55 (2, 2)    |
|          |          | Total young       | 6         | 3         | 3         | 6 (6, 6)    | 86 (86, 86)    | 3.11 (3, 3)    |
|          |          | Total male        | 15        | 12        | 11        | 16 (15, 18) | 233 (214, 257) | 8.46 (8, 9)    |
|          |          | Total female      | 12        | 11        | 8         | 16 (13, 19) | 233 (186, 257) | 8.46 (7, 10)   |

|         |            |                   |           |           |           |             |                |                |
|---------|------------|-------------------|-----------|-----------|-----------|-------------|----------------|----------------|
|         |            |                   |           |           |           |             | 271)           |                |
|         |            | <b>Total dogs</b> | <b>27</b> | <b>23</b> | <b>19</b> | 33 (29, 36) | 466 (414, 514) | 16.89 (15, 19) |
| Haraj   | Mukstar    | Adult Male        | 12        | 13        | 10        | 16 (13, 17) | 97 (81, 106)   | 13.42 (11, 15) |
|         |            | Adult female      | 11        | 12        | 8         | 16 (13, 19) | 102 (81, 119)  | 14.09 (11, 16) |
|         |            | Total adult       | 23        | 25        | 18        | 32 (28, 35) | 199 (175, 219) | 27.47 (24, 30) |
|         |            | Young male        | 3         | 3         | 2         | 4 (3, 6)    | 27 (19, 38)    | 3.74 (3, 5)    |
|         |            | Young female      | 5         | 4         | 2         | 9 (4, 13)   | 56 (25, 81)    | 7.77 (3, 11)   |
|         |            | Total young       | 8         | 7         | 4         | 13 (7, 19)  | 84 (44, 119)   | 11.56 (6, 16)  |
|         |            | Total male        | 15        | 16        | 12        | 20 (17, 22) | 125 (106, 138) | 17.19 (15, 19) |
|         |            | Total female      | 16        | 16        | 10        | 25 (20, 30) | 158 (125, 188) | 21.8 (17, 26)  |
|         |            | <b>Total dogs</b> | <b>31</b> | <b>32</b> | <b>22</b> | 45 (39, 50) | 281 (244, 313) | 38.75 (34, 43) |
| Nabipur | Tarn Taran | Adult Male        | 6         | 7         | 4         | 10 (7, 13)  | 85 (58, 108)   | 10.21 (7, 13)  |
|         |            | Adult female      | 7         | 5         | 5         | 7 (7, 7)    | 58 (58, 58)    | 7.01 (7, 7)    |
|         |            | Total adult       | 13        | 12        | 9         | 17 (14, 20) | 143 (117, 167) | 17.22 (14, 20) |
|         |            | Young male        | 6         | 5         | 4         | 7 (5, 9)    | 62 (42, 75)    | 7.41 (5, 9)    |
|         |            | Young             | 3         | 2         | 2         | 3 (3, 3)    | 25 (25, 25)    | 3 (3, 3)       |

|       |          |                   |           |           |           |             |                |                |
|-------|----------|-------------------|-----------|-----------|-----------|-------------|----------------|----------------|
|       |          | female            |           |           |           |             |                |                |
|       |          | Total young       | 9         | 7         | 6         | 10 (8, 12)  | 87 (67, 100)   | 10.44 (8, 12)  |
|       |          | Total male        | 12        | 12        | 8         | 28 (24, 31) | 231 (200, 258) | 27.78 (24, 31) |
|       |          | Total female      | 10        | 7         | 7         | 10 (10, 10) | 83 (83, 83)    | 10.01 (10, 10) |
|       |          | <b>Total dogs</b> | <b>22</b> | <b>19</b> | <b>15</b> | 31 (25, 37) | 260 (208, 308) | 31.18 (25, 37) |
| Kheda | Mohali   | Adult Male        | 6         | 8         | 5         | 10 (7, 11)  | 136 (100, 157) | 12.31 (9, 14)  |
|       |          | Adult female      | 9         | 11        | 8         | 12 (11, 14) | 176 (157, 200) | 15.97 (14, 18) |
|       |          | Total adult       | 15        | 19        | 13        | 22 (19, 24) | 312 (271, 343) | 28.32 (25, 31) |
|       |          | Young male        | 1         | 2         | 1         | 2 (2, 2)    | 29 (29, 29)    | 2.59 (3, 3)    |
|       |          | Young female      | 1         | 2         | 1         | 2 (2, 2)    | 29 (29, 29)    | 2.59 (3, 3)    |
|       |          | Total young       | 2         | 4         | 2         | 4 (4, 4)    | 57 (57, 57)    | 5.18 (5, 5)    |
|       |          | Total male        | 7         | 10        | 6         | 12 (9, 13)  | 165 (129, 186) | 14.99 (12, 17) |
|       |          | Total female      | 10        | 13        | 9         | 14 (12, 16) | 206 (171, 229) | 18.65 (16, 21) |
|       |          | <b>Total dogs</b> | <b>17</b> | <b>23</b> | <b>15</b> | 26 (23, 28) | 371 (329, 400) | 33.68 (30, 36) |
|       |          |                   |           |           |           |             |                |                |
| Tut   | Firozpur | Adult Male        | 11        | 15        | 9         | 18 (15, 21) | 114 (94, 131)  | 10.99 (9, 13)  |
|       |          | Adult             | 13        | 12        | 10        | 16 (13, 17) | 97 (81, 106)   | 9.39 (8, 10)   |

|         |            |                   |           |           |           |                    |                       |                       |
|---------|------------|-------------------|-----------|-----------|-----------|--------------------|-----------------------|-----------------------|
| Sodhian | Nawanshahr | female            |           |           |           |                    |                       |                       |
|         |            | Total adult       | 24        | 27        | 19        | 34 (30, 38)        | 213 (188, 238)        | 20.53 (18, 23)        |
|         |            | Young male        | 6         | 4         | 4         | 6 (6, 6)           | 38 (38, 38)           | 3.62 (4, 4)           |
|         |            | Young female      | 3         | 4         | 2         | 5 (3, 8)           | 31 (19, 50)           | 3.02 (2, 5)           |
|         |            | Total young       | 9         | 8         | 6         | 12 (9, 15)         | 74 (56, 94)           | 7.16 (5, 9)           |
|         |            | Total male        | 17        | 19        | 13        | 25 (28, 21)        | 154 (175, 131)        | 14.92 (17, 13)        |
|         |            | Total female      | 16        | 16        | 12        | 21 (18, 24)        | 133 (113, 150)        | 12.82 (11, 14)        |
|         |            | <b>Total dogs</b> | <b>33</b> | <b>35</b> | <b>25</b> | <b>46 (41, 51)</b> | <b>288 (256, 319)</b> | <b>27.83 (25, 31)</b> |
|         |            | Adult Male        | 6         | 7         | 5         | 8 (7, 10)          | 139 (117, 167)        | 11.03 (9, 13)         |
|         |            | Adult female      | 4         | 5         | 4         | 5 (5, 5)           | 83 (83, 83)           | 6.62 (7, 7)           |
|         |            | Total adult       | 10        | 12        | 9         | 13 (12, 15)        | 222 (200, 250)        | 17.62 (16, 20)        |
|         |            | Young male        | 1         | 2         | 1         | 2 (2, 2)           | 33 (33, 33)           | 2.65 (3, 3)           |
|         |            | Young female      | 2         | 1         | 1         | 2 (2, 2)           | 33 (33, 33)           | 2.65 (3, 3)           |
|         |            | Total young       | 3         | 3         | 2         | 4 (2, 6)           | 72 (33, 100)          | 5.74 (3, 8)           |
|         |            | Total male        | 7         | 9         | 6         | 10 (8, 12)         | 174 (133, 200)        | 13.81 (11, 16)        |
|         |            | Total female      | 6         | 6         | 5         | 7 (6, 8)           | 120 (100, 133)        | 9.5 (8, 11)           |

|               |          |                   |           |           |           |             |                |                |
|---------------|----------|-------------------|-----------|-----------|-----------|-------------|----------------|----------------|
|               |          | <b>Total dogs</b> | <b>13</b> | <b>15</b> | <b>11</b> | 18 (15, 20) | 295 (250, 333) | 23.4 (20, 26)  |
| Zeera ward 15 | Firozpur | Adult Male        | 10        | 12        | 5         | 23 (14, 32) | 134 (82, 188)  | 15.74 (10, 22) |
|               |          | Adult female      | 13        | 9         | 6         | 19 (13, 24) | 112 (76, 141)  | 13 (9, 16)     |
|               |          | Total adult       | 23        | 21        | 11        | 43 (31, 54) | 253 (182, 318) | 29.43 (21, 37) |
|               |          | Young male        | 3         | 2         | 1         | 5 (2, 8)    | 29 (12, 47)    | 3.42 (1, 5)    |
|               |          | Young female      | 2         | 3         | 2         | 3 (3, 3)    | 18 (18, 18)    | 2.05 (2, 2)    |
|               |          | Total young       | 5         | 5         | 3         | 8 (4, 12)   | 47 (24, 71)    | 5.48 (3, 8)    |
|               |          | Total male        | 13        | 14        | 6         | 29 (18, 40) | 171 (106, 235) | 19.85 (12, 27) |
|               |          | Total female      | 15        | 12        | 8         | 22 (16, 27) | 130 (94, 159)  | 15.06 (11, 18) |
|               |          | <b>Total dogs</b> | <b>28</b> | <b>26</b> | <b>14</b> | 51 (39, 63) | 301 (229, 371) | 34.91 (27, 43) |
| Zeera ward 16 | Firozpur | Adult Male        | 19        | 23        | 11        | 39 (29, 49) | 30 (22, 38)    | 22.52 (17, 28) |
|               |          | Adult female      | 15        | 17        | 12        | 21 (18, 24) | 16 (14, 19)    | 12.12 (10, 14) |
|               |          | Total adult       | 34        | 40        | 23        | 59 (50, 67) | 46 (39, 52)    | 34.06 (29, 39) |
|               |          | Young male        | 6         | 5         | 3         | 10 (6, 13)  | 7 (5, 10)      | 5.77 (3, 8)    |
|               |          | Young             | 5         | 4         | 3         | 7 (4, 8)    | 5 (3, 6)       | 4.04 (2, 5)    |



|                  |          |                   |           |           |           |               |                |                |
|------------------|----------|-------------------|-----------|-----------|-----------|---------------|----------------|----------------|
|                  |          | female            |           |           |           |               |                |                |
|                  |          | Total young       | 11        | 9         | 6         | 16 (11, 21)   | 13 (9, 16)     | 9.24 (6, 12)   |
|                  |          | Total male        | 25        | 28        | 14        | 49 (38, 60)   | 38 (29, 47)    | 28.29 (22, 35) |
|                  |          | Total female      | 20        | 21        | 15        | 28 (24, 31)   | 22 (19, 24)    | 16.17 (14, 18) |
|                  |          | <b>Total dogs</b> | <b>45</b> | <b>49</b> | <b>29</b> | 76 (65, 86)   | 59 (50, 67)    | 43.88 (38, 50) |
| Ludhiana ward 62 | Ludhiana | Adult Male        | 31        | 26        | 17        | 47 (38, 55)   | 100 (81, 117)  | 7.33 (6, 9)    |
|                  |          | Adult female      | 20        | 17        | 12        | 28 (23, 33)   | 60 (49, 70)    | 4.38 (4, 5)    |
|                  |          | Total adult       | 51        | 43        | 29        | 75 (65, 85)   | 160 (138, 181) | 11.73 (10, 13) |
|                  |          | Young male        | 9         | 7         | 4         | 15 (9, 21)    | 32 (19, 45)    | 2.34 (1, 3)    |
|                  |          | Young female      | 7         | 9         | 3         | 19 (9, 29)    | 40 (19, 62)    | 2.96 (1, 5)    |
|                  |          | Total young       | 16        | 16        | 7         | 35 (20, 49)   | 75 (43, 104)   | 5.48 (3, 8)    |
|                  |          | Total male        | 40        | 33        | 21        | 62 (51, 73)   | 133 (109, 155) | 9.72 (8, 11)   |
|                  |          | Total female      | 27        | 26        | 15        | 46 (36, 56)   | 98 (77, 119)   | 7.21 (6, 9)    |
|                  |          | <b>Total dogs</b> | <b>67</b> | <b>59</b> | <b>36</b> | 109 (94, 124) | 232 (200, 264) | 17.03 (15, 19) |
| Ludhiana ward 63 | Ludhiana | Adult Male        | 38        | 33        | 20        | 62 (51, 73)   | 51 (42, 60)    | 3.87 (3, 5)    |
|                  |          | Adult             | 28        | 30        | 16        | 52 (41, 62)   | 43 (34, 51)    | 3.23 (3, 4)    |

|                         |          |                   |           |           |           |               |                   |                   |
|-------------------------|----------|-------------------|-----------|-----------|-----------|---------------|-------------------|-------------------|
|                         |          | female            |           |           |           |               |                   |                   |
|                         |          | Total adult       | 66        | 63        | 36        | 115 (98, 131) | 95 (81, 108)      | 7.15 (6, 8)       |
|                         |          | Young male        | 11        | 12        | 8         | 16 (13, 19)   | 14 (11, 16)       | 1.02 (1, 1)       |
|                         |          | Young             | 14        | 13        | 9         | 20 (16, 24)   | 17 (13, 20)       | 1.24 (1, 1)       |
|                         |          | female            |           |           |           |               |                   |                   |
|                         |          | Total young       | 25        | 25        | 17        | 37 (31, 42)   | 30 (26, 35)       | 2.28 (2, 3)       |
|                         |          | Total male        | 49        | 45        | 28        | 78 (67, 90)   | 65 (55, 74)       | 4.87 (4, 6)       |
|                         |          | Total female      | 42        | 43        | 25        | 72 (60, 83)   | 59 (50, 69)       | 4.47 (4, 5)       |
|                         |          | <b>Total dogs</b> | <b>91</b> | <b>88</b> | <b>53</b> | 151 (13, 167) | 124 (11, 138)     | 9.38 (1, 10)      |
| Bhagta Bhaika<br>ward 8 | Bathinda | Adult Male        | 4         | 6         | 2         | 11 (5, 16)    | 213 (100,<br>320) | 9.39 (4, 14)      |
|                         |          | Adult             | 5         | 3         | 2         | 7 (4, 10)     | 140 (80, 200)     | 6.16 (4, 9)       |
|                         |          | female            |           |           |           |               |                   |                   |
|                         |          | Total adult       | 9         | 9         | 4         | 19 (10, 27)   | 380 (200,<br>540) | 16.73 (9, 24)     |
|                         |          | Young male        | 1         | 2         | 1         | 2 (2, 2)      | 40 (40, 40)       | 1.76 (2, 2)       |
|                         |          | Young             | 1         | 1         | 0         | 3 (0, 6)      | 60 (0, 120)       | 2.64 (0, 5)       |
|                         |          | female            |           |           |           |               |                   |                   |
|                         |          | Total young       | 2         | 3         | 1         | 5 (0, 11)     | 100 (0, 220)      | 4.4 (0, 10)       |
|                         |          | Total male        | 5         | 8         | 3         | 13 (7, 18)    | 250 (140,<br>360) | 11 (6, 16)        |
|                         |          | Total female      | 6         | 4         | 2         | 11 (5, 16)    | 213 (100,<br>320) | 9.39 (4, 14)      |
|                         |          | <b>Total dogs</b> | <b>11</b> | <b>12</b> | <b>5</b>  | 25 (14, 35)   | 500 (280,<br>700) | 22.01 (12,<br>31) |
| Bhagta Bhaika           | Bathinda | Adult Male        | 9         | 8         | 5         | 14 (9, 18)    | 100 (64, 129)     | 14.52 (9, 19)     |

ward 1

|                   |           |           |           |             |                |                |
|-------------------|-----------|-----------|-----------|-------------|----------------|----------------|
| Adult female      | 5         | 4         | 2         | 9 (4, 13)   | 64 (29, 93)    | 9.34 (4, 13)   |
| Total adult       | 14        | 12        | 7         | 23 (16, 30) | 167 (114, 214) | 24.25 (17, 31) |
| Young male        | 2         | 3         | 1         | 5 (2, 8)    | 36 (14, 57)    | 5.19 (2, 8)    |
| Young female      | 4         | 5         | 3         | 7 (4, 8)    | 46 (29, 57)    | 6.74 (4, 8)    |
| Total young       | 6         | 8         | 4         | 12 (7, 16)  | 83 (50, 114)   | 12.03 (7, 17)  |
| Total male        | 11        | 11        | 6         | 20 (13, 25) | 140 (93, 179)  | 20.3 (13, 26)  |
| Total female      | 9         | 9         | 5         | 16 (10, 20) | 112 (71, 143)  | 16.26 (10, 21) |
| <b>Total dogs</b> | <b>20</b> | <b>20</b> | <b>11</b> | 36 (27, 44) | 255 (193, 314) | 37.09 (28, 46) |

Balachaur ward 4

Nawanshahr

|              |    |    |    |             |                |                |
|--------------|----|----|----|-------------|----------------|----------------|
| Adult Male   | 19 | 25 | 10 | 46 (32, 60) | 231 (160, 300) | 43.41 (30, 56) |
| Adult female | 23 | 20 | 14 | 33 (27, 38) | 163 (135, 190) | 30.58 (25, 36) |
| Total adult  | 42 | 45 | 33 | 78 (64, 91) | 391 (320, 455) | 73.28 (60, 85) |
| Young male   | 7  | 4  | 3  | 9 (6, 12)   | 45 (30, 60)    | 8.44 (6, 11)   |
| Young female | 3  | 4  | 3  | 4 (4, 4)    | 20 (20, 20)    | 3.75 (4, 4)    |
| Total young  | 10 | 8  | 6  | 13 (9, 16)  | 66 (45, 80)    | 12.33 (8, 15)  |
| Total male   | 22 | 29 | 19 | 57 (41, 71) | 284 (205, 355) | 53.34 (38, 67) |
| Total female | 30 | 24 | 20 | 37 (31, 42) | 183 (155, 211) | 34.24 (29, 39) |

|                  |            |                   |           |           |           |              |                        |                       |
|------------------|------------|-------------------|-----------|-----------|-----------|--------------|------------------------|-----------------------|
|                  |            | <b>Total dogs</b> | <b>52</b> | <b>53</b> | <b>39</b> | 91 (77, 105) | 210)<br>457 (385, 525) | 39)<br>85.67 (72, 98) |
| Balachaur ward 5 | Nawanshahr | Adult Male        | 5         | 6         | 3         | 10 (6, 13)   | 190 (120, 260)         | 8.36 (5, 11)          |
|                  |            | Adult female      | 3         | 2         | 1         | 5 (2, 8)     | 100 (40, 160)          | 4.4 (2, 7)            |
|                  |            | Total adult       | 8         | 8         | 4         | 15 (9, 21)   | 304 (180, 420)         | 13.38 (8, 18)         |
|                  |            | Young male        | 0         | 2         | 0         | 2 (2, 2)     | 40 (40, 40)            | 1.76 (2, 2)           |
|                  |            | Young female      | 2         | 3         | 2         | 3 (3, 3)     | 60 (60, 60)            | 2.64 (3, 3)           |
|                  |            | Total young       | 2         | 5         | 2         | 5 (5, 5)     | 100 (100, 100)         | 4.4 (4, 4)            |
|                  |            | Total male        | 5         | 8         | 3         | 13 (7, 18)   | 250 (140, 360)         | 11 (6, 16)            |
|                  |            | Total female      | 5         | 5         | 3         | 8 (5, 11)    | 160 (100, 220)         | 7.04 (4, 10)          |
|                  |            | <b>Total dogs</b> | <b>10</b> | <b>13</b> | <b>6</b>  | 21 (14, 28)  | 420 (280, 560)         | 18.49 (12, 25)        |
| Bathinda ward 9  | Bathinda   | Adult Male        | 15        | 12        | 6         | 29 (18, 39)  | 78 (49, 105)           | 7.77 (5, 11)          |
|                  |            | Adult female      | 9         | 8         | 5         | 14 (9, 18)   | 38 (24, 49)            | 3.79 (2, 5)           |
|                  |            | Total adult       | 24        | 20        | 11        | 43 (31, 54)  | 116 (84, 146)          | 11.57 (8, 15)         |
|                  |            | Young male        | 5         | 5         | 3         | 8 (5, 11)    | 22 (14, 30)            | 2.17 (1, 3)           |

|                  |          |                   |           |           |           |             |                |                |
|------------------|----------|-------------------|-----------|-----------|-----------|-------------|----------------|----------------|
|                  |          | Young female      | 3         | 5         | 2         | 7 (4, 10)   | 19 (11, 27)    | 1.89 (1, 3)    |
|                  |          | Total young       | 8         | 10        | 5         | 16 (9, 21)  | 42 (24, 57)    | 4.19 (2, 6)    |
|                  |          | Total male        | 20        | 17        | 9         | 37 (25, 48) | 99 (68, 130)   | 9.96 (7, 13)   |
|                  |          | Total female      | 12        | 13        | 7         | 22 (15, 28) | 59 (41, 76)    | 5.89 (4, 8)    |
|                  |          | <b>Total dogs</b> | <b>32</b> | <b>30</b> | <b>16</b> | 59 (46, 72) | 160 (124, 195) | 16.02 (12, 19) |
| Bathinda ward 11 | Bathinda | Adult Male        | 14        | 18        | 8         | 31 (21, 40) | 63 (43, 82)    | 7.02 (5, 9)    |
|                  |          | Adult female      | 16        | 19        | 10        | 30 (22, 37) | 61 (45, 76)    | 6.84 (5, 8)    |
|                  |          | Total adult       | 30        | 37        | 18        | 61 (49, 73) | 124 (100, 149) | 13.96 (11, 17) |
|                  |          | Young male        | 7         | 4         | 3         | 9 (6, 12)   | 18 (12, 24)    | 2.06 (1, 3)    |
|                  |          | Young female      | 4         | 5         | 3         | 7 (4, 8)    | 13 (8, 16)     | 1.49 (1, 2)    |
|                  |          | Total young       | 11        | 9         | 6         | 16 (11, 21) | 33 (22, 43)    | 3.69 (3, 5)    |
|                  |          | Total male        | 21        | 22        | 11        | 41 (30, 52) | 84 (61, 106)   | 9.42 (7, 12)   |
|                  |          | Total female      | 20        | 24        | 13        | 37 (29, 44) | 74 (59, 90)    | 8.35 (7, 10)   |
|                  |          | <b>Total dogs</b> | <b>41</b> | <b>46</b> | <b>24</b> | 78 (64, 92) | 159 (131, 188) | 17.84 (15, 21) |

---

**Table S3:** Total number of stray dogs estimated in different village(s)/ward(s) in Punjab state of India (using *SuperDuplicates method*).

| Name of the village/ward | District | Type of dog       | n1<br>(day 1) | n2<br>(day 2) | M<br>(re-sighted) | Incidence data                  |                  |
|--------------------------|----------|-------------------|---------------|---------------|-------------------|---------------------------------|------------------|
|                          |          |                   |               |               |                   | Estimate $\pm$ SE (95% CI)      | Undetected % (N) |
| Galib Ran Singh          | Ludhiana | Adult Male        | 13            | 11            | 10                | 28.90 $\pm$ 4.10 (25.18-44.43)  | 16.96 (4.90)     |
|                          |          | Adult female      | 9             | 10            | 6                 | 26.04 $\pm$ 10.18 (19.88-75.48) | 27.04 (7.04)     |
|                          |          | Total adult       | 22            | 21            | 16                | 54.39 $\pm$ 6.36 (47.1-74.62)   | 20.94 (11.39)    |
|                          |          | Young male        | 3             | 4             | 3                 | 8.33 $\pm$ 2.75 (7.11-23.64)    | 16 (1.33)        |
|                          |          | Young female      | 2             | 1             | 1                 | 4 $\pm$ 1.42 (3.13-10.86)       | 25 (1)           |
|                          |          | Total young       | 5             | 5             | 4                 | 12.25 $\pm$ 3.92 (10.22-32.77)  | 18.37 (2.25)     |
|                          |          | Total male        | 16            | 15            | 13                | 37.23 $\pm$ 4.45 (32.77-52.91)  | 16.74 (6.23)     |
|                          |          | Total female      | 11            | 11            | 7                 | 30.04 $\pm$ 7012 (23.81-57.71)  | 26.75 (8.04)     |
|                          |          | <b>Total dogs</b> | <b>27</b>     | <b>26</b>     | <b>20</b>         | 66.61 $\pm$ 7.08 (58.22-88.5)   | 20.44(13.61)     |
| Pipli                    | Faridkot | Adult Male        | 18            | 21            | 12                | 54.19 $\pm$ 8.5 (44.46-81.25)   | 28.03 (15.19)    |

|         |         |                   |           |           |           |                                 |               |
|---------|---------|-------------------|-----------|-----------|-----------|---------------------------------|---------------|
|         |         | Adult female      | 17        | 18        | 13        | 44.31 ± 6.68 (37.63-67.94)      | 21.01 (9.31)  |
|         |         | Total adult       | 35        | 39        | 25        | 132.02 ± 24.42 (100.29- 202.05) | 43.95 (58.02) |
|         |         | Young male        | 5         | 4         | 2         | 15.12 ± 8.71 (9.78 - 57.15)     | 40.5 (6.12)   |
|         |         | Young female      | 3         | 5         | 2         | 12.5 ± 6.11 (8.61 - 41.34)      | 36 (4.5)      |
|         |         | Total young       | 8         | 9         | 4         | 27.56 ± 15.01 (18.35-99.91)     | 38.32 (10.56) |
|         |         | Total male        | 23        | 25        | 14        | 68.64 ± 11.5 (55.45-105.2)      | 30.07 (20.64) |
|         |         | Total female      | 20        | 23        | 15        | 56.07 ± 8.06 (47.29-82.78)      | 23.31 (13.07) |
|         |         | <b>Total dogs</b> | <b>43</b> | <b>48</b> | <b>29</b> | 124.14 ± 13.03 (106.76-160.67)  | 26.69 (33.14) |
| Jodhpur | Barnala | Adult Male        | 21        | 19        | 14        | 52.07 ± 7.6 (43.89-77.47)       | 23.18 (12.07) |
|         |         | Adult female      | 17        | 20        | 15        | 45.07 ± 5.06 (39.61-61.97)      | 17.9 (8.07)   |
|         |         | Total adult       | 38        | 39        | 29        | 96.86 ± 8.05 (86.25-119.64)     | 20.51 (19.86) |
|         |         | Young male        | 3         | 4         | 2         | 10.12 ± 4.62 (7.38-32.8)        | 30.86 (3.12)  |
|         |         | Young female      | 6         | 5         | 4         | 14.06 ± 5.66 (11.28-44.38)      | 21.78 (3.06)  |
|         |         | Total young       | 9         | 9         | 6         | 24 ± 8.38 (18.78 -              | 25 (6)        |

|           |            |                   |           |           |           |                               |               |
|-----------|------------|-------------------|-----------|-----------|-----------|-------------------------------|---------------|
|           |            |                   |           |           |           | 64.12)                        |               |
|           |            | Total male        | 24        | 23        | 16        | 62.02 ± 7.78 (52.77-86.06)    | 24.21 (15.02) |
|           |            | Total female      | 23        | 25        | 19        | 59.07 ± 5.99(52.09-77.91)     | 18.73 (11.07) |
|           |            | <b>Total dogs</b> | <b>47</b> | <b>48</b> | <b>35</b> | 120.71 ± 9.58 (107.69-147.12) | 21.3 (25.71)  |
| Rauli     | Hoshiarpur | Adult Male        | 5         | 4         | 3         | 12 ± 5.1 (9.31 -38.44)        | 25 (3)        |
|           |            | Adult female      | 6         | 5         | 4         | 14.06 ± 5.66 (11.28-44.38)    | 21.78 (3.06)  |
|           |            | Total adult       | 11        | 9         | 7         | 26.04 ± 6.11 (21.16-51.29)    | 23.18 (6.04)  |
|           |            | Young male        | 1         | 2         | 1         | 4 ± 1.42 (3.13-10.86)         | 25 (1)        |
|           |            | Young female      | 2         | 2         | 1         | 6.25 ± 2.42 (4.4 -16.52)      | 36 (2.25)     |
|           |            | Total young       | 3         | 4         | 2         | 10.12 ± 4.62 (7.38-32.8)      | 30.86 (3.12)  |
|           |            | Total male        | 6         | 6         | 4         | 16 ± 7.23 (12.38-54.43)       | 25 (4)        |
|           |            | Total female      | 8         | 7         | 5         | 20 ± 6.31 (15.74-48.89)       | 25 (5)        |
|           |            | <b>Total dogs</b> | <b>14</b> | <b>13</b> | <b>9</b>  | 36 ± 1 7.13 (29.29-62.35)     | 25 (9)        |
|           |            |                   |           |           |           |                               |               |
| Mangewala | Moga       | Adult Male        | 16        | 18        | 13        | 42.48 ± 5.97(36.44-63.42)     | 19.96 (8.48)  |
|           |            | Adult female      | 15        | 12        | 10        | 34.23 ± 6.3 (28.65-           | 21.11 (7.23)  |



|               |            |                   |           |           |           |                             |               |
|---------------|------------|-------------------|-----------|-----------|-----------|-----------------------------|---------------|
|               |            |                   |           |           |           | 58.54)                      |               |
|               |            | Total adult       | 31        | 30        | 23        | 76.7 ± 7.32 (67.58-98.47)   | 20.46 (15.7)  |
|               |            | Young male        | 4         | 3         | 3         | 8.33 ± 2.75 (7.11-23.64)    | 16 (1.33)     |
|               |            | Young female      | 3         | 4         | 2         | 10.12 ± 4.62 (7.38-32.8)    | 30.86 (3.12)  |
|               |            | Total young       | 7         | 7         | 5         | 18.05 ± 6.45 (14.45-50.66)  | 22.44 (4.05)  |
|               |            | Total male        | 20        | 21        | 16        | 50.77 ± 7.47 (43.58-77.94)  | 19.24 (9.77)  |
|               |            | Total female      | 18        | 16        | 12        | 44.08 ± 7.47 (36.76-70.88)  | 22.87 (10.08) |
|               |            | <b>Total dogs</b> | <b>38</b> | <b>37</b> | <b>28</b> | 94.72 ± 8.51 (83.77-119.34) | 20.82 (19.72) |
| Karahal Kalan | Kapurthala | Adult Male        | 8         | 6         | 4         | 20.25 ± 12.08 (14.54-86.02) | 30.86 (6.25)  |
|               |            | Adult female      | 4         | 5         | 4         | 10.56 ± 2.88 (9.14-25.95)   | 14.79 (1.56)  |
|               |            | Total adult       | 12        | 11        | 8         | 30.03 ± 6.79 (24.43-57.49)  | 23.41 (7.03)  |
|               |            | Young male        | 2         | 3         | 1         | 9 ± 3.34 (5.96-21.66)       | 44.44 (4)     |
|               |            | Young female      | 3         | 4         | 3         | 8.33 ± 2.75 (7.11-23.64)    | 16 (1.33)     |
|               |            | Total young       | 5         | 7         | 4         | 16 ± 7.23 (12.38-54.43)     | 25 (4)        |
|               |            | Total male        | 10        | 9         | 5         | 28.8 ± 12.95 (20.37-        | 34.03 (9.8)   |

|         |         |                   |           |           |           |                                     |               |
|---------|---------|-------------------|-----------|-----------|-----------|-------------------------------------|---------------|
| Devgarh | Patiala | Total female      | 7         | 9         | 7         | 89.26)<br>18.89 ± 3.8 (16.41-36.59) | 15.31 (2.89)  |
|         |         | <b>Total dogs</b> | <b>17</b> | <b>18</b> | <b>12</b> | 46.02 ± 7.42 (38.33-71.51)          | 23.95 (11.02) |
|         |         | Adult Male        | 13        | 10        | 7         | 32.14 ± 8.34 (24.99-65.03)          | 28.44 (9.14)  |
|         |         | Adult female      | 7         | 6         | 5         | 16.2 ± 7.14 (13.23-56.98)           | 19.75 (3.2)   |
|         |         | Total adult       | 20        | 16        | 12        | 48 ± 7.84 (39.73-74.59)             | 25 (12)       |
|         |         | Young male        | 2         | 2         | 2         | 4.5 ± 0.84 (4.05-8.84)              | 11.11 (0.5)   |
|         |         | Young female      | 4         | 3         | 3         | 8.33 ± 2.75 (7.11-23.64)            | 16 (1.33)     |
|         |         | Total young       | 6         | 5         | 5         | 12.8 ± 3.22 (11.17-29.86)           | 14.06 (1.8)   |
|         |         | Total male        | 15        | 12        | 9         | 36 ± 1 7.13 (29.29-62.35)           | 25 (9)        |
|         |         | Total female      | 11        | 9         | 8         | 24.5 ± 4.25 (20.94-41.5)            | 18.37 (4.5)   |
| Mander  | Mansa   | <b>Total dogs</b> | <b>26</b> | <b>21</b> | <b>17</b> | 60.24 ± 7.2 (51.88-82.9)            | 21.97 (13.24) |
|         |         | Adult Male        | 21        | 18        | 17        | 46.12 ± 4.69 (41.19-62.11)          | 15.43 (7.12)  |
|         |         | Adult female      | 16        | 14        | 12        | 36.75 ± 5.18 (31.78-55.64)          | 18.37 (6.75)  |

|                |           |  |                   |           |           |           |                              |               |
|----------------|-----------|--|-------------------|-----------|-----------|-----------|------------------------------|---------------|
|                |           |  | Total adult       | 37        | 32        | 29        | 82.79 ± 7.28 (74.22-105.42)  | 16.66 (13.79) |
|                |           |  | Young male        | 3         | 4         | 3         | 8.33 ± 2.75 (7.11-23.64)     | 16 (1.33)     |
|                |           |  | Young female      | 3         | 3         | 2         | 8 ± 3.69 (6.18-27.74)        | 25 (2)        |
|                |           |  | Total young       | 6         | 7         | 5         | 16.2 ± 7.14 (13.23-56.98)    | 19.75 (3.2)   |
|                |           |  | Total male        | 24        | 22        | 20        | 54.45 ± 4.84 (48.97-70.01)   | 15.52 (8.45)  |
|                |           |  | Total female      | 19        | 17        | 14        | 44.64 ± 7.01 (38.15-70.81)   | 19.36 (8.64)  |
|                |           |  | <b>Total dogs</b> | <b>43</b> | <b>39</b> | <b>34</b> | 98.94 ± 6.99 (89.79-118.84)  | 17.12 (16.94) |
| Rali Ali Kalan | Gurdaspur |  | Adult Male        | 6         | 7         | 3         | 21.33 ± 10.28 (14.27-67.87)  | 39.06 (8.33)  |
|                |           |  | Adult female      | 4         | 5         | 2         | 15.12 ± 8.71 (9.78 - 57.15)  | 40.5 (6.12)   |
|                |           |  | Total adult       | 10        | 12        | 5         | 36.45 ± 17.33 (24.27-113.96) | 39.64 (14.45) |
|                |           |  | Young male        | 6         | 3         | 2         | 15.12 ± 8.71 (9.78 - 57.15)  | 40.5 (6.12)   |
|                |           |  | Young female      | 2         | 2         | 2         | 4.5 ± 0.84 (4.05-8.84)       | 11.11 (0.5)   |
|                |           |  | Total young       | 8         | 5         | 4         | 18.06 ± 7.81 (13.58-57.02)   | 28.03 (5.06)  |
|                |           |  | Total male        | 12        | 10        | 5         | 36.45 ± 17.33 (24.27-113.96) | 39.64 (14.45) |
|                |           |  | Total female      | 6         | 7         | 4         | 18.06 ± 7.81 (13.58-         | 28.03 (5.06)  |

|         |                  |                   |           |           |           |                             |               |
|---------|------------------|-------------------|-----------|-----------|-----------|-----------------------------|---------------|
|         |                  |                   |           |           |           | 57.02)                      |               |
|         |                  | <b>Total dogs</b> | <b>18</b> | <b>17</b> | <b>9</b>  | 53.78 ± 15.03 (39.73-109.6) | 34.92 (18.78) |
| Mahdian | Fatehgarh Sahib  | Adult Male        | 9         | 7         | 6         | 20.17 ± 6.43 (16.48-52.25)  | 20.66 (4.17)  |
|         |                  | Adult female      | 4         | 6         | 3         | 14.08 ± 5.71 (10.53-41.4)   | 28.99 (4.08)  |
|         |                  | Total adult       | 13        | 13        | 9         | 34.03 ± 8.16 (27.54-67.84)  | 23.59 (8.03)  |
|         |                  | Young male        | 1         | 2         | 0         |                             |               |
|         |                  | Young female      | 3         | 4         | 3         | 8.33 ± 2.75 (7.11-23.64)    | 16 (1.33)     |
|         |                  | Total young       | 4         | 6         | 3         | 14.08 ± 5.71 (10.53-41.4)   | 28.99 (4.08)  |
|         |                  | Total male        | 10        | 9         | 6         | 26.04 ± 10.18 (19.88-75.48) | 27.04 (7.04)  |
|         |                  | Total female      | 7         | 10        | 6         | 22.04 ± 5.65 (17.86-46.55)  | 22.87 (5.04)  |
|         |                  | <b>Total dogs</b> | <b>17</b> | <b>19</b> | <b>12</b> | 48 ± 8.71 (39.35-78.97)     | 25 (12)       |
| Rangian | Rupnagar (Ropar) | Adult Male        | 11        | 12        | 8         | 30.03 ± 6.79 (24.43-57.49)  | 23.41 (7.03)  |
|         |                  | Adult female      | 6         | 7         | 5         | 16.2 ± 7.14 (13.23-56.98)   | 19.75 (3.2)   |
|         |                  | Total adult       | 17        | 19        | 13        | 46.17 ± 7.23 (38.91-71.61)  | 22.03 (10.17) |

|            |          |  |                   |           |           |           |                               |               |
|------------|----------|--|-------------------|-----------|-----------|-----------|-------------------------------|---------------|
|            |          |  | Young male        | 1         | 1         | 1         | 2.25 ± 0.21 (2.06-3.07)       | 11.11 (0.25)  |
|            |          |  | Young female      | 3         | 3         | 2         | 8 ± 3.69 (6.18-27.74)         | 25 (2)        |
|            |          |  | Total young       | 4         | 4         | 3         | 10.08 ± 4.38 (8.16-34.6)      | 20.66 (2.08)  |
|            |          |  | Total male        | 12        | 13        | 9         | 32.11 ± 6.81 (26.46-59.56)    | 22.15 (7.11)  |
|            |          |  | Total female      | 9         | 10        | 7         | 24.14 ± 4.46 (20.18-41.33)    | 21.3(5.14)    |
|            |          |  | <b>Total dogs</b> | <b>21</b> | <b>23</b> | <b>16</b> | 56.25 ± 6.75 (48.47-77.6)     | 21.78 (12.25) |
|            |          |  |                   |           |           |           |                               |               |
|            |          |  | Adult Male        | 23        | 21        | 17        | 54.72 ± 7.79 (46.99-82.42)    | 19.59 (10.72) |
|            |          |  | Adult female      | 18        | 15        | 11        | 44 ± 7.2 (36.41-68.43)        | 25 (11)       |
|            |          |  | Total adult       | 41        | 36        | 28        | 98.44 ± 9.89 (86.07-127.69)   | 21.78 (21.44) |
| Gobindpura | Bathinda |  | Young male        | 4         | 5         | 4         | 10.56 ± 2.88 (9.14-25.95)     | 14.79 (1.56)  |
|            |          |  | Young female      | 5         | 2         | 2         | 10.12 ± 4.62 (7.38-32.8)      | 30.86 (3.12)  |
|            |          |  | Total young       | 9         | 7         | 6         | 20.17 ± 6.43 (16.48-52.25)    | 20.66 (4.17)  |
|            |          |  | Total male        | 27        | 26        | 21        | 65.19 ± 6.7 (57.45-86.37)     | 18.7 (12.19)  |
|            |          |  | Total female      | 23        | 17        | 13        | 54.02 ± 7.65 (45.15-78.15)    | 25.95 (14.02) |
|            |          |  | <b>Total dogs</b> | <b>50</b> | <b>43</b> | <b>34</b> | 118.6 ± 10.29 (104.99-147.65) | 21.58 (25.6)  |
|            |          |  |                   |           |           |           |                               |               |

|          |           |                   |           |           |          |                             |              |
|----------|-----------|-------------------|-----------|-----------|----------|-----------------------------|--------------|
| KotKalan | Jalandhar | Adult Male        | 6         | 7         | 4        | 18.06 ± 7.81 (13.58-57.02)  | 28.03 (5.06) |
|          |           | Adult female      | 5         | 4         | 3        | 12 ± 5.1 (9.31 -38.44)      | 25 (3)       |
|          |           | Total adult       | 11        | 11        | 7        | 30.04 ± 7012 (23.81-57.71)  | 26.75 (8.04) |
|          |           | Young male        | 1         | 2         | 0        |                             |              |
|          |           | Young female      | 1         | 2         | 1        | 4 ± 1.42 (3.13-10.86)       | 25 (1)       |
|          |           | Total young       | 2         | 4         | 1        | 12.25 ± 5.54 (7.41-33.8)    | 51.02 (6.25) |
|          |           | Total male        | 7         | 9         | 4        | 25 ± 12.14 (17.22-82.22)    | 36 (9)       |
|          |           | Total female      | 6         | 6         | 4        | 16 ± 7.23 (12.38-54.43)     | 25 (4)       |
|          |           | <b>Total dogs</b> | <b>13</b> | <b>15</b> | <b>8</b> | 40.5 ± 18.47 (29.52-130.99) | 30.86 (12.5) |
| Khoba    | Pathankot | Adult Male        | 4         | 3         | 3        | 8.33 ± 2.75 (7.11-23.64)    | 16 (1.33)    |
|          |           | Adult female      | 3         | 4         | 2        | 10.12 ± 4.62 (7.38-32.8)    | 30.86 (3.12) |
|          |           | Total adult       | 7         | 7         | 5        | 18.05 ± 6.45 (14.45-5066)   | 22.44 (4.05) |
|          |           | Young male        | 2         | 1         | 1        | 4 ± 1.42 (3.13-10.86)       | 25 (1)       |
|          |           | Young female      | 1         | 1         | 1        | 2.25 ± 0.21 (2.06-3.07)     | 11.11 (0.25) |
|          |           | Total young       | 3         | 2         | 2        | 6.12 ± 1.95 (5.11-16.34)    | 18.37 (1.12) |
|          |           | Total male        | 6         | 4         | 4        | 12.25 ± 3.92 (10.22-        | 18.37 (2.25) |

|            |          |                   |           |           |           |                                |               |
|------------|----------|-------------------|-----------|-----------|-----------|--------------------------------|---------------|
|            |          |                   |           |           |           | 32.77)                         |               |
|            |          | Total female      | 4         | 5         | 3         | 12 ± 5.1 (9.31 -38.44)         | 25 (3)        |
|            |          | <b>Total dogs</b> | <b>10</b> | <b>9</b>  | <b>7</b>  | 24.14 ± 4.46 (20.18-41.33)     | 21.3(5.14)    |
| Gobindgarh | Fazilka  | Adult Male        | 25        | 20        | 14        | 62.16 ± 11.06 (50.41-99.46)    | 27.61 (17.16) |
|            |          | Adult female      | 15        | 16        | 12        | 38.52 ± 5.28 (33.17-57.01)     | 19.52 (7.52)  |
|            |          | Total adult       | 40        | 36        | 26        | 100.04 ± 10.21 (86.82-129.41)  | 24.03 (24.04) |
|            |          | Young male        | 3         | 4         | 3         | 8.33 ± 2.75 (7.11-23.64)       | 16 (1.33)     |
|            |          | Young female      | 4         | 5         | 4         | 10.56 ± 2.88 (9.14-25.95)      | 14.79 (1.56)  |
|            |          | Total young       | 7         | 9         | 7         | 18.89 ± 3.8 (16.41-36.59)      | 15.31 (2.89)  |
|            |          | Total male        | 28        | 24        | 17        | 70.01 ± 10.83 (58.07-105.51)   | 25.73 (18.01) |
|            |          | Total female      | 19        | 21        | 16        | 49 ± 6 (42.74-69.53)           | 18.37 (9)     |
|            |          | <b>Total dogs</b> | <b>47</b> | <b>45</b> | <b>33</b> | 118.37 ± 11.02 (104.01-149.91) | 22.28 (26.37) |
| Jethuwal   | Amritsar | Adult Male        | 19        | 17        | 14        | 44.64 ± 7.01 (38.15-70.81)     | 19.36 (8.64)  |
|            |          | Adult female      | 13        | 11        | 10        | 28.90 ± 4.10 (25.18-44.43)     | 16.96 (4.90)  |
|            |          | Total adult       | 32        | 28        | 24        | 73.5 ± 7.02 (65.18-            | 18.37 (13.5)  |

|       |         |                   |           |           |           |                            |              |
|-------|---------|-------------------|-----------|-----------|-----------|----------------------------|--------------|
|       |         |                   |           |           | 95.21)    |                            |              |
|       |         | Young male        | 2         | 4         | 2         | 8 ± 3.69 (6.18-27.74)      | 25 (2)       |
|       |         | Young female      | 6         | 6         | 4         | 16 ± 7.23 (12.38-54.43)    | 25 (4)       |
|       |         | Total young       | 8         | 10        | 6         | 24 ± 8.38 (18.78 - 64.12)  | 25 (6)       |
|       |         | Total male        | 21        | 21        | 16        | 52.56 ± 7.32 (45.09-78.05) | 20.1 (10.56) |
|       |         | Total female      | 19        | 17        | 14        | 44.64 ± 7.01 (38.15-70.81) | 19.36 (8.64) |
|       |         | <b>Total dogs</b> | <b>40</b> | <b>38</b> | <b>30</b> | 97.2 ± 7.11 (87.51-116.76) | 19.75 (19.2) |
| Bugar | Sangrur | Adult Male        | 12        | 10        | 9         | 26.69 ± 4.43 (22.98-44.44) | 17.59 (4.69) |
|       |         | Adult female      | 9         | 10        | 7         | 24.14 ± 4.46 (20.18-41.33) | 21.3(5.14)   |
|       |         | Total adult       | 21        | 20        | 16        | 50.77 ± 5.94 (44.25-70.35) | 19.24 (9.77) |
|       |         | Young male        | 3         | 2         | 2         | 6.12 ± 1.95 (5.11-16.34)   | 18.37 (1.12) |
|       |         | Young female      | 3         | 1         | 1         | 6.25 ± 2.42 (4.4 - 16.52)  | 36 (2.25)    |
|       |         | Total young       | 6         | 3         | 3         | 12 ± 5.1 (9.31 -38.44)     | 25 (3)       |
|       |         | Total male        | 15        | 12        | 11        | 32.82 ± 4.58 (28.49-49.7)  | 17.73 (5.82) |
|       |         | Total female      | 12        | 11        | 8         | 30.03 ± 6.79 (24.43-57.49) | 23.41 (7.03) |



|         |            |                   |           |           |           |                             |               |
|---------|------------|-------------------|-----------|-----------|-----------|-----------------------------|---------------|
|         |            | <b>Total dogs</b> | <b>27</b> | <b>23</b> | <b>19</b> | 62.64 ± 6.68 (54.78-83.45)  | 20.18 (12.64) |
| Haraj   | Mukstar    | Adult Male        | 12        | 13        | 10        | 30.62 ± 6.09 (26-56.62)     | 18.37 (5.62)  |
|         |            | Adult female      | 11        | 12        | 8         | 30.03 ± 6.79 (24.43-57.49)  | 23.41 (7.03)  |
|         |            | Total adult       | 23        | 25        | 18        | 60.5 ± 7.84 (52.04-86.67)   | 20.66 (12.5)  |
|         |            | Young male        | 3         | 3         | 2         | 8 ± 3.69 (6.18-27.74)       | 25 (2)        |
|         |            | Young female      | 5         | 4         | 2         | 15.12 ± 8.71 (9.78 - 57.15) | 40.5 (6.12)   |
|         |            | Total young       | 8         | 7         | 4         | 22.56 ± 8.92 (16.21-62.17)  | 33.52 (7.56)  |
|         |            | Total male        | 15        | 16        | 12        | 38.52 ± 5.28 (33.17-57.01)  | 19.52 (7.52)  |
|         |            | Total female      | 16        | 16        | 10        | 44.1 ± 8.85 (35.35-75.64)   | 27.44 (12.1)  |
|         |            | <b>Total dogs</b> | <b>31</b> | <b>32</b> | <b>22</b> | 82.1 ± 10.16 (70.18-113.83) | 23.27 (19.1)  |
| Nabipur | Tarn Taran | Adult Male        | 6         | 7         | 4         | 18.06 ± 7.81 (13.58-57.02)  | 28.03 (5.06)  |
|         |            | Adult female      | 7         | 5         | 5         | 14.45 ± 4.71 (12.21-40.08)  | 16.96 (2.45)  |
|         |            | Total adult       | 13        | 12        | 9         | 32.11 ± 6.81 (26.46-59.56)  | 22.15 (7.11)  |
|         |            | Young male        | 6         | 5         | 4         | 12.8 ± 3.22 (11.17-         | 14.06 (1.8)   |

|       |          |                   |           |           |           |                            |               |
|-------|----------|-------------------|-----------|-----------|-----------|----------------------------|---------------|
|       |          |                   |           |           |           | 29.86)                     |               |
|       |          | Young female      | 3         | 2         | 2         | 6.12 ± 1.95 (5.11-16.34)   | 18.37 (1.12)  |
|       |          | Total young       | 9         | 7         | 6         | 20.17 ± 6.43 (16.48-52.25) | 20.66 (4.17)  |
|       |          | Total male        | 12        | 12        | 8         | 32 ± 7.82 (25.61-63.8)     | 25 (8)        |
|       |          | Total female      | 10        | 7         | 7         | 20.57 ± 4.22 (17.57-39.29) | 17.36 (3.57)  |
|       |          | <b>Total dogs</b> | <b>22</b> | <b>19</b> | <b>15</b> | 52.27 ± 6.85 (44.76-74.8)  | 21.56 (11.27) |
| Kheda | Mohali   | Adult Male        | 6         | 8         | 5         | 18.05 ± 6.45 (14.45-50.66) | 22.44 (4.05)  |
|       |          | Adult female      | 9         | 11        | 8         | 24.5 ± 4.25 (20.94-41.5)   | 18.37 (4.5)   |
|       |          | Total adult       | 15        | 19        | 13        | 42.48 ± 5.97(36.44-63.42)  | 19.96 (8.48)  |
|       |          | Young male        | 1         | 2         | 1         | 4 ± 1.42 (3.13-10.86)      | 25 (1)        |
|       |          | Young female      | 1         | 2         | 1         | 4 ± 1.42 (3.13-10.86)      | 25 (1)        |
|       |          | Total young       | 2         | 4         | 2         | 8 ± 3.69 (6.18-27.74)      | 25 (2)        |
|       |          | Total male        | 7         | 10        | 6         | 22.04 ± 5.65 (17.86-46.55) | 22.87 (5.04)  |
|       |          | Total female      | 10        | 13        | 9         | 28.44 ± 5.02 (24.17-48.32) | 19.14 (5.44)  |
|       |          | <b>Total dogs</b> | <b>17</b> | <b>23</b> | <b>15</b> | 50.42 ± 6.87(43.21-73.84)  | 20.66 (10.42) |
|       |          |                   |           |           |           |                            |               |
| Tut   | Firozpur | Adult Male        | 11        | 15        | 9         | 34.03 ± 8.16 (27.54-       | 23.59 (8.03)  |

|         |            |              |                   |           |           |                            |                                   |               |
|---------|------------|--------------|-------------------|-----------|-----------|----------------------------|-----------------------------------|---------------|
|         |            |              | Adult female      | 13        | 12        | 10                         | 67.84)<br>30.62 ± 6.09 (26-56.62) | 18.37 (5.62)  |
|         |            |              | Total adult       | 24        | 27        | 19                         | 64.47 ± 7.96 (55.61-90.39)        | 20.9 (13.47)  |
|         |            |              | Young male        | 6         | 4         | 4                          | 12.25 ± 3.92 (10.22-32.77)        | 18.37 (2.25)  |
|         |            |              | Young female      | 3         | 4         | 2                          | 10.12 ± 4.62 (7.38-32.8)          | 30.86 (3.12)  |
|         |            |              | Total young       | 9         | 8         | 6                          | 22.04 ± 5.65 (17.86-46.55)        | 22.87 (5.04)  |
|         |            |              | Total male        | 17        | 19        | 13                         | 46.17 ± 6.63 (39.17-68.65)        | 22.03 (10.17) |
|         |            |              | Total female      | 16        | 16        | 12                         | 40.33 ± 6.04 (34.33-61.77)        | 20.66 (8.33)  |
|         |            |              | <b>Total dogs</b> | <b>33</b> | <b>35</b> | <b>25</b>                  | 86.49 ± 8.43 (75.89-111.33)       | 21.38 (18.49) |
| Sodhian | Nawanshahr | Adult Male   | 6                 | 7         | 5         | 16.2 ± 7.14 (13.23-56.98)  | 19.75 (3.2)                       |               |
|         |            | Adult female | 4                 | 5         | 4         | 10.56 ± 2.88 (9.14-25.95)  | 14.79 (1.56)                      |               |
|         |            | Total adult  | 10                | 12        | 9         | 26.69 ± 4.43 (22.98-44.44) | 17.59 (4.69)                      |               |
|         |            | Young male   | 1                 | 2         | 1         | 4 ± 1.42 (3.13-10.86)      | 25 (1)                            |               |
|         |            | Young female | 2                 | 1         | 1         | 4 ± 1.42 (3.13-10.86)      | 25 (1)                            |               |
|         |            | Total young  | 3                 | 3         | 2         | 8 ± 3.69 (6.18-27.74)      | 25 (2)                            |               |
|         |            | Total male   | 7                 | 9         | 6         | 20.17 ± 6.43 (16.48-       | 20.66 (4.17)                      |               |

|       |         |          |                   |           |           |           |                                      |               |
|-------|---------|----------|-------------------|-----------|-----------|-----------|--------------------------------------|---------------|
|       |         |          | Total female      | 6         | 6         | 5         | 52.25)<br>14.45 ± 4.71 (12.21-40.08) | 16.96 (2.45)  |
|       |         |          | <b>Total dogs</b> | <b>13</b> | <b>15</b> | <b>11</b> | 34.57 ± 5.43 (29.59-55.05)           | 19 (6.57)     |
| Zeera | ward 15 | Firozpur | Adult Male        | 10        | 12        | 5         | 36.45 ± 17.33 (24.27-113.96)         | 39.64 (14.45) |
|       |         |          | Adult female      | 13        | 9         | 6         | 32.67 ± 13.13 (23.62-92.08)          | 32.65 (10.67) |
|       |         |          | Total adult       | 23        | 21        | 11        | 68.75 ± 14.66 (52.45-116.53)         | 36 (24.75)    |
|       |         |          | Young male        | 3         | 2         | 1         | 9 ± 3.34 (5.96-21.66)                | 44.44 (4)     |
|       |         |          | Young female      | 2         | 3         | 2         | 6.12 ± 1.95 (5.11-16.34)             | 18.37 (1.12)  |
|       |         |          | Total young       | 5         | 5         | 3         | 14.08 ± 5.71 (10.53-41.4)            | 28.99 (4.08)  |
|       |         |          | Total male        | 13        | 14        | 6         | 45.38 ± 17.2 (30.88-114)             | 40.5 (18.38)  |
|       |         |          | Total female      | 15        | 12        | 8         | 55.26 ± 9.52 (35.31-123.13)          | 51.14 (28.26) |
|       |         |          | <b>Total dogs</b> | <b>28</b> | <b>26</b> | <b>14</b> | 82.57 ± 13.52 (65.84-122.97)         | 34.6 (28.57)  |
| Zeera | ward 16 | Firozpur | Adult Male        | 19        | 23        | 11        | 63.84 ± 11.59 (50.23-99.97)          | 34.21 (21.84) |
|       |         |          | Adult female      | 15        | 17        | 12        | 40.33 ± 6.04 (34.33-61.77)           | 20.66 (8.33)  |

|                     |          |  |                   |           |           |           |                                |               |
|---------------------|----------|--|-------------------|-----------|-----------|-----------|--------------------------------|---------------|
|                     |          |  | Total adult       | 34        | 40        | 23        | 102.27 ± 11.43 (87.19-134.6)   | 27.64 (28.27) |
|                     |          |  | Young male        | 6         | 5         | 3         | 16.33 ± 9.57 (11.51-67.05)     | 32.65 (5.33)  |
|                     |          |  | Young female      | 5         | 4         | 3         | 12 ± 5.1 (9.31 -38.44)         | 25 (3)        |
|                     |          |  | Total young       | 11        | 9         | 6         | 28.17 ± 11.14 (21.09-80.93)    | 28.99 (8.17)  |
|                     |          |  | Total male        | 25        | 28        | 14        | 80.16 ± 14.28 (63.32-124.51)   | 31.23 (24.07) |
|                     |          |  | Total female      | 20        | 21        | 15        | 52.27 ± 6.85 (44.76-74.8)      | 21.56 (11.27) |
|                     |          |  | <b>Total dogs</b> | <b>45</b> | <b>49</b> | <b>29</b> | 130.42 ± 13.84 (111.73-168.82) | 27.93 (36.42) |
| Ludhiana ward<br>62 | Ludhiana |  | Adult Male        | 31        | 26        | 17        | 80.53 ± 11.19 (66.71-114.03)   | 29.22 (23.53) |
|                     |          |  | Adult female      | 20        | 17        | 12        | 50.02 ± 8.62 (41-79.43)        | 26.03 (13.02) |
|                     |          |  | Total adult       | 51        | 43        | 29        | 130.42 ± 13.84 (111.73-168.82) | 27.93 (36.42) |
|                     |          |  | Young male        | 9         | 7         | 4         | 25 ± 12.14 (17.22-82.22)       | 36 (9)        |
|                     |          |  | Young female      | 7         | 9         | 3         | 30.08 ± 13.14 (18.99-82.4)     | 46.81 (14.08) |
|                     |          |  | Total young       | 16        | 16        | 7         | 54.32 ± 24.37 (35.93-158.72)   | 41.09 (22.32) |
|                     |          |  | Total male        | 40        | 33        | 21        | 105.19 ± 13.61 (87.54-144.28)  | 30.6 (32.19)  |

|                      |          |                   |           |           |           |                                |               |
|----------------------|----------|-------------------|-----------|-----------|-----------|--------------------------------|---------------|
|                      |          | Total female      | 27        | 26        | 15        | 77.07 ± 13.12 (61.86-118.4)    | 31.23 (24.07) |
|                      |          | <b>Total dogs</b> | <b>67</b> | <b>59</b> | <b>36</b> | 182.25 ± 18.58 (155.94-231.69) | 30.86 (56.25) |
| Ludhiana ward 63     | Ludhiana | Adult Male        | 38        | 33        | 20        | 103.51 ± 15.58 (84.34-150.27)  | 31.41 (32.51) |
|                      |          | Adult female      | 28        | 30        | 16        | 85.56 ± 13.99 (68.78-128.45)   | 32.21 (27.56) |
|                      |          | Total adult       | 66        | 63        | 36        | 189.06 ± 21.44 (159.47-247.39) | 31.77 (60.06) |
|                      |          | Young male        | 11        | 12        | 8         | 30.03 ± 6.79 (24.43-57.49)     | 23.41 (7.03)  |
|                      |          | Young female      | 14        | 13        | 9         | 36 ± 17.13 (29.29-62.35)       | 25 (9)        |
|                      |          | Total young       | 25        | 25        | 17        | 66.01 ± 8.43 (56.07-92.22)     | 24.26 (16.01) |
|                      |          | Total male        | 49        | 45        | 28        | 132.89 ± 14.66 (113.04-173.45) | 29.27 (38.89) |
|                      |          | Total female      | 42        | 43        | 25        | 121 ± 14.45 (101.88-161.8)     | 29.75 (36)    |
|                      |          | <b>Total dogs</b> | <b>91</b> | <b>88</b> | <b>53</b> | 253.89 ± 20.06 (223.7-304.46)  | 29.5 (74.89)  |
| Bhagta Bhaika ward 8 | Bathinda | Adult Male        | 4         | 6         | 2         | 18 ± 9.13 (11.34-57.9)         | 44.44 (8)     |
|                      |          | Adult female      | 5         | 3         | 2         | 12.5 ± 6.11 (8.61 - 41.34)     | 36 (4.5)      |

|                      |          |  |                   |           |           |           |                             |               |
|----------------------|----------|--|-------------------|-----------|-----------|-----------|-----------------------------|---------------|
|                      |          |  | Total adult       | 9         | 9         | 4         | 30.25 ± 14.76 (19.91-96.41) | 40.5 (12.25)  |
|                      |          |  | Young male        | 1         | 2         | 1         | 4 ± 1.42 (3.13-10.86)       | 25 (1)        |
|                      |          |  | Young female      | 1         | 1         | 0         |                             |               |
|                      |          |  | Total young       | 2         | 3         | 1         | 9 ± 3.34 (5.96-21.66)       | 44.44 (4)     |
|                      |          |  | Total male        | 5         | 8         | 3         | 21.33 ± 10.28 (14.27-67.87) | 39.06 (8.33)  |
|                      |          |  | Total female      | 6         | 4         | 2         | 18 ± 9.13 (11.34-57.9)      | 44.44 (8)     |
|                      |          |  | <b>Total dogs</b> | <b>11</b> | <b>12</b> | <b>5</b>  | 39.2 ± 21.63 (25.23-140.66) | 41.33 (16.2)  |
|                      |          |  |                   |           |           |           |                             |               |
|                      |          |  |                   |           |           |           |                             |               |
|                      |          |  |                   |           |           |           |                             |               |
| Bhagta Bhaika ward 1 | Bathinda |  | Adult Male        | 9         | 8         | 5         | 24.2 ± 9.63 (69.43-17.99)   | 29.75 (7.2)   |
|                      |          |  | Adult female      | 5         | 4         | 2         | 15.12 ± 8.71 (9.78 - 57.15) | 40.5 (6.12)   |
|                      |          |  | Total adult       | 14        | 12        | 7         | 38.89 ± 11.97 (28.75-86.47) | 33.15 (12.89) |
|                      |          |  | Young male        | 2         | 3         | 1         | 9 ± 3.34 (5.96-21.66)       | 44.44 (4)     |
|                      |          |  | Young female      | 4         | 5         | 3         | 12 ± 5.1 (9.31 -38.44)      | 25 (3)        |
|                      |          |  | Total young       | 6         | 8         | 4         | 20.25 ± 12.08 (14.54-86.02) | 30.86 (6.25)  |
|                      |          |  | Total male        | 11        | 11        | 6         | 32.67 ± 13.13 (23.62-92.08) | 32.65 (10.67) |
|                      |          |  | Total female      | 9         | 9         | 5         | 26.45 ± 8.58 (19.62-61.99)  | 31.95 (8.45)  |
|                      |          |  | <b>Total dogs</b> | <b>20</b> | <b>20</b> | <b>11</b> | 59.11 ± 10.86 (46.78-93.89) | 32.33 (19.11) |
|                      |          |  |                   |           |           |           |                             |               |

|                     |            |                   |           |           |           |                                |               |
|---------------------|------------|-------------------|-----------|-----------|-----------|--------------------------------|---------------|
| Balachaur ward<br>4 | Nawanshahr | Adult Male        | 19        | 25        | 10        | 72.9 ± 15.9 (54.55-123.18)     | 39.64 (28.9)  |
|                     |            | Adult female      | 23        | 20        | 14        | 58.02 ± 9.28 (47.92-88.8)      | 25.88 (15.02) |
|                     |            | Total adult       | 42        | 45        | 24        | 128.34 ± 17.52 (105.65-178.68) | 32.21 (41.34) |
|                     |            | Young male        | 7         | 4         | 3         | 16.33 ± 9.57 (11.51-67.05)     | 32.65 (5.33)  |
|                     |            | Young female      | 3         | 4         | 3         | 8.33 ± 2.75 (7.11-23.64)       | 16 (1.33)     |
|                     |            | Total young       | 10        | 8         | 6         | 24 ± 8.38 (18.78 - 64.12)      | 25 (6)        |
|                     |            | Total male        | 26        | 29        | 13        | 88.92 ± 18 (67.78-145.03)      | 38.15 (33.92) |
|                     |            | Total female      | 26        | 24        | 17        | 66.01 ± 9.65 (55.38-97.68)     | 24.26 (16.01) |
|                     |            | <b>Total dogs</b> | <b>52</b> | <b>53</b> | <b>30</b> | 151.88 ± 15.77 (129.67-194.06) | 30.86 (46.88) |
| Balachaur ward<br>5 | Nawanshahr | Adult Male        | 5         | 6         | 3         | 16.33 ± 9.57 (11.51-67.05)     | 32.65 (5.33)  |
|                     |            | Adult female      | 3         | 2         | 1         | 9 ± 3.34 (5.96-21.66)          | 44.44 (4)     |
|                     |            | Total adult       | 8         | 8         | 4         | 25 ± 12.14 (17.22-82.22)       | 36 (9)        |
|                     |            | Young male        | 0         | 2         | 0         |                                |               |
|                     |            | Young female      | 2         | 3         | 2         | 9 ± 3.34 (5.96-21.66)          | 44.44 (4)     |
|                     |            | Total young       | 2         | 5         | 2         | 10.12 ± 4.62 (7.38-32.8)       | 30.86 (3.12)  |
|                     |            |                   |           |           |           |                                |               |



|                  |          |                   |           |           |           |                              |               |
|------------------|----------|-------------------|-----------|-----------|-----------|------------------------------|---------------|
|                  |          | Total male        | 5         | 8         | 3         | 21.33 ± 10.28 (14.27-67.87)  | 39.06 (8.33)  |
|                  |          | Total female      | 5         | 5         | 3         | 14.08 ± 5.71 (10.53-41.4)    | 28.99 (4.08)  |
|                  |          | <b>Total dogs</b> | <b>10</b> | <b>13</b> | <b>6</b>  | 35.04 ± 13.89 (24.98-96.08)  | 34.36 (12.04) |
| Bathinda ward 9  | Bathinda | Adult Male        | 15        | 12        | 6         | 45.38 ± 18.12 (30.65-119.42) | 40.5 (18.38)  |
|                  |          | Adult female      | 9         | 8         | 5         | 24.2 ± 9.63 (69.43-17.99)    | 29.75 (7.2)   |
|                  |          | Total adult       | 24        | 20        | 11        | 68.75 ± 14.66 (52.45-116.53) | 36 (24.75)    |
|                  |          | Young male        | 5         | 5         | 3         | 14.08 ± 5.71 (10.53-41.4)    | 28.99 (4.08)  |
|                  |          | Young female      | 3         | 5         | 2         | 12.5 ± 6.11 (8.61 - 41.34)   | 36 (4.5)      |
|                  |          | Total young       | 8         | 10        | 5         | 26.45 ± 8.58 (19.62-61.99)   | 31.95 (8.45)  |
|                  |          | Total male        | 20        | 17        | 9         | 58.78 ± 16.84 (42.69-120.32) | 37.05 (21.78) |
|                  |          | Total female      | 12        | 13        | 7         | 36.57 ± 10.8 (27.45-79.6)    | 31.64 (11.57) |
|                  |          | <b>Total dogs</b> | <b>32</b> | <b>30</b> | <b>16</b> | 95.06 ± 18.12 (74.11-152.28) | 34.78 (33.06) |
| Bathinda ward 11 | Bathinda | Adult Male        | 14        | 18        | 8         | 50 ± 14.94 (36.36-106.37)    | 36 (18)       |

|                                 |                   |           |           |           |                                |                |
|---------------------------------|-------------------|-----------|-----------|-----------|--------------------------------|----------------|
|                                 | Adult female      | 16        | 19        | 10        | 50.62 ± 8.67 (40.66-78.14)     | 30.86 (15.62)  |
|                                 | Total adult       | 30        | 37        | 18        | 100.35 ± 17.27 (79.83-153.67)  | 33.23 (33.35)  |
|                                 | Young male        | 7         | 4         | 3         | 16.33 ± 9.57 (11.51-67.05)     | 32.65 (5.33)   |
|                                 | Young female      | 4         | 5         | 3         | 12 ± 5.1 (9.31 -38.44)         | 25 (3)         |
|                                 | Total young       | 11        | 9         | 6         | 28.17 ± 11.14 (21.09-80.93)    | 28.99 (8.17)   |
|                                 | Total male        | 21        | 22        | 11        | 66.27 ± 14.2 (50.73-113.08)    | 35.12 (23.27)  |
|                                 | Total female      | 20        | 24        | 13        | 62.48 ± 12.67 (49.47-106.41)   | 29.58 (18.48)  |
|                                 | <b>Total dogs</b> | <b>41</b> | <b>46</b> | <b>24</b> | 128.34 ± 15.39 (107.41-170.76) | 32.21 (41.34)  |
| <b>Total dogs in rural area</b> | Adult Male        | 271       | 261       | 191       | 684.2 ± 24.63 (643.05-740.59)  | 22.24 (152.2)  |
|                                 | Adult female      | 212       | 213       | 159       | 536.25 ± 16.51 (508.31-573.57) | 20.75 (111.25) |
|                                 | Total adult       | 483       | 474       | 350       | 1220.2 ± 29.56 (1168.3-1284.8) | 21.57 (263.18) |
|                                 | Young male        | 63        | 66        | 44        | 170.05 ± 12.94 (151.46-204.04) | 24.14 (41.05)  |
|                                 | Young female      | 68        | 66        | 46        | 176.09 ± 13 (157.29-210.05)    | 23.9 (42.09)   |
|                                 | Total young       | 131       | 132       | 90        | 346.14 ± 22.01 (312.91-401.47) | 24.02 (83.14)  |
|                                 |                   |           |           |           |                                |                |

|                             |                                  |     |     |     |                                      |                |
|-----------------------------|----------------------------------|-----|-----|-----|--------------------------------------|----------------|
| Total dogs in<br>urban area | Total male                       | 334 | 327 | 235 | 854.06 ± 24.67<br>(811.44-908.75)    | 22.6 (193.06)  |
|                             | Total female                     | 280 | 279 | 205 | 711.82 ± 22.94<br>(673.06-763.77)    | 21.47 (152.82) |
|                             | Total dogs                       | 614 | 606 | 440 | 1565.7 ± 34 (1505.2-<br>1639)        | 22.08 (345.68) |
|                             | <b>Mean dogs<br/>per village</b> |     |     |     | <b>71.17 ± 1.54 (68.4-<br/>74.5)</b> |                |
|                             | Adult Male                       | 164 | 169 | 87  | 506.9 ± 28.18 (459.84-<br>571.42)    | 34.31 (173.9)  |
|                             | Adult female                     | 137 | 129 | 80  | 374.11 ± 24.36<br>(335.89-433.23)    | 28.9 (108.11)  |
|                             | Total adult                      | 301 | 298 | 167 | 878.38 ± 37.77<br>(813.61-962.7)     | 31.81 (279.38) |
|                             | Young male                       | 51  | 46  | 27  | 142.37 ± 16.67<br>(119.59-188.14)    | 31.87 (45.37)  |
|                             | Young female                     | 45  | 52  | 30  | 134.41 ± 13.46<br>(115.88-171.12)    | 27.83 (37.41)  |
|                             | Total young                      | 96  | 98  | 57  | 276.32 ± 21.54<br>(243.71-330.32)    | 29.79 (82.32)  |
|                             | Total male                       | 215 | 215 | 114 | 648.98 ± 38.93<br>(584.98-739.42)    | 33.74 (218.98) |
|                             | Total female                     | 182 | 181 | 110 | 508.48 ± 29.33<br>(461.38-578.12)    | 28.61 (145.48) |
|                             | Total dogs                       | 397 | 396 | 224 | 1154.3 ± 46.13<br>(1074.6-1256.6)    | 31.3 (361.34)  |
|                             | <b>Mean dogs</b>                 |     |     |     | <b>115.4 ± 4.61 (107.4-</b>          |                |

| Total dogs in<br>rural & urban<br>area | per ward     |      |      | 125.7) |                                    |                |
|----------------------------------------|--------------|------|------|--------|------------------------------------|----------------|
|                                        | Adult Male   | 435  | 430  | 278    | 1174.9 ± 38.46<br>(1108.2-1259.8)  | 26.37 (309.86) |
|                                        | Adult female | 349  | 342  | 239    | 904.71 ± 27.54<br>(857.17-965.84)  | 23.62 (213.71) |
|                                        | Total adult  | 784  | 772  | 517    | 2078.01 ± 43.39<br>(1999.7-2170.2) | 25.12 (522.01) |
|                                        | Young male   | 114  | 112  | 71     | 310.03 ± 17.47<br>(282.51-352.25)  | 25.49 (79.03)  |
|                                        | Young female | 113  | 118  | 76     | 310.03 ± 17.47<br>(282.51-352.25)  | 25.49 (79.03)  |
|                                        | Total young  | 227  | 230  | 147    | 620.44 ± 25.32<br>(577.85-678.04)  | 26.34 (163.44) |
|                                        | Total male   | 549  | 542  | 349    | 1485.4 ± 41.71<br>(1411.7-1576)    | 26.55 (394.39) |
|                                        | Total female | 462  | 460  | 315    | 1214.4 ± 35.25<br>(1153.1-1292.1)  | 24.08 (292.42) |
|                                        | Total dogs   | 1011 | 1002 | 664    | 2698.2 ± 50.86<br>(2605.3-2805.3)  | 25.39 (685.17) |
